# Supplementary material for: Neural responses to syllable-induced P1m and social impairment in children with autism spectrum disorder and typically developing Peers
Source: PubMed Central journal article supplement (PMC10923473; doi:10.1371/journal.pone.0298020), 2024-03-08
Supplement: pone.0298020.s003.pdf [file pone.0298020.s003.pdf]

**Supplementary Table 1.** Position of the three coils on the heads of the participants.

|                              | TD(n=24)     | ASD (n=40)   | t     | <i>p</i> |
|------------------------------|--------------|--------------|-------|----------|
| <b>Left Mastoid Process</b>  |              |              |       |          |
| x                            | 71.8 (18.7)  | 66.5 (7.3)   | 1.6   | 0.11     |
| y                            | 11.8 (20.2)  | 24.4(23.4)   | -2.2  | 0.03*    |
| z                            | -38.7 (29.4) | -37.0 (27.5) | -0.2  | 0.82     |
| <b>Right Mastoid Process</b> |              |              |       |          |
| x                            | -69.2 (7.1)  | -66.4 (7.9)  | -1.41 | 0.16     |
| y                            | 11.5 (23.9)  | 25.4 (24.2)  | -2.24 | 0.03*    |
| z                            | -39.6 (30.2) | -41.7 (27.2) | 0.28  | 0.78     |
| <b>Nasion</b>                |              |              |       |          |
| x                            | -0.48 (9.9)  | -1.03 (11.7) | 0.19  | 0.85     |
| y                            | -63.2 (22.5) | -61.0 (20.0) | -0.41 | 0.68     |
| z                            | 28.7 (21.6)  | 29.1 (16.3)  | -0.08 | 0.93     |

TD, typically developing children; ASD, autism spectrum disorder;

\* $p < .05$ .
