# Supplementary material for: Neural responses to syllable-induced P1m and social impairment in children with autism spectrum disorder and typically developing Peers
Source: PubMed Central journal article supplement (PMC10923473; doi:10.1371/journal.pone.0298020), 2024-03-08
Supplement: pone.0298020.s004.pdf [file pone.0298020.s004.pdf]

**Supplementary Table 2.** Association between SRS-total T-score and right or left P1m log-intensity controlling for Mental processing scale score in K-ABC.

|                                                           | Coeff. | Robust SE | t     | <i>p</i> | 95%CI        | F     | Prob > F | <i>R</i> <sup>2</sup> |
|-----------------------------------------------------------|--------|-----------|-------|----------|--------------|-------|----------|-----------------------|
| <b>vs.SRS-total T-score</b>                               |        |           |       |          |              |       |          |                       |
| Right P1m log-intensity                                   | -1.48  | 3.95      | -0.38 | 0.708    | -9.41 6.45   | 21.54 | <0.001   | 0.55                  |
| Diagnosis                                                 | 24.74  | 15.65     | 1.58  | 0.120    | -6.69 56.17  |       |          |                       |
| Interaction between right P1m log-intensity and diagnosis | -1.55  | 5.88      | -0.26 | 0.793    | -13.35 10.26 |       |          |                       |
| Mental processing scale score                             | 0.07   | 0.10      | 0.66  | 0.513    | -0.14 0.28   |       |          |                       |
| <b>vs.SRS-total T-score</b>                               |        |           |       |          |              |       |          |                       |
| Left P1m log-intensity                                    | -3.47  | 3.44      | -1.01 | 0.318    | -10.36 3.43  | 21.78 | <0.001   | 0.53                  |
| Diagnosis                                                 | 5.13   | 12.46     | 0.41  | 0.682    | -19.84 30.10 |       |          |                       |
| Interaction between left P1m log-intensity and diagnosis  | 5.78   | 4.32      | 1.34  | 0.187    | -2.89 14.44  |       |          |                       |
| Mental processing scale score                             | 0.01   | 0.12      | 0.10  | 0.923    | -0.23 0.26   |       |          |                       |

Coeff., regression coefficient; SE, standard error; CI, confidence interval;
