# Supplementary material for: Neural responses to syllable-induced P1m and social impairment in children with autism spectrum disorder and typically developing Peers
Source: PubMed Central journal article supplement (PMC10923473; doi:10.1371/journal.pone.0298020), 2024-03-08
Supplement: pone.0298020.s005.pdf [file pone.0298020.s005.pdf]

**Supplementary Table 3.** Association between SRS-total T-score and right or left P1m log-intensity for each diagnosis group controlling for Mental processing scale score in K-ABC

|                               | Coeff. | Robust SE | t     | p     | 95%CI       | F    | Prob > F | R <sup>2</sup> |
|-------------------------------|--------|-----------|-------|-------|-------------|------|----------|----------------|
| <b>vs.SRS-total T-score</b>   |        |           |       |       |             |      |          |                |
| <b><u>TD</u></b>              |        |           |       |       |             |      |          |                |
| Right P1m log-intensity       | -0.82  | 3.94      | -0.21 | 0.837 | -9.04 7.39  | 0.03 | 0.97     | <0.01          |
| Mental processing scale score | -0.01  | -0.86     | -0.06 | 0.950 | -0.19 0.17  |      |          |                |
| <b><u>ASD</u></b>             |        |           |       |       |             |      |          |                |
| Right P1m log-intensity       | -3.05  | 4.46      | -0.68 | 0.499 | -12.16 6.06 | 0.44 | 0.67     | 0.03           |
| Mental processing scale score | 0.10   | 0.14      | 0.70  | 0.486 | -0.19 0.39  |      |          |                |
| <b>vs.SRS-total T-score</b>   |        |           |       |       |             |      |          |                |
| <b><u>TD</u></b>              |        |           |       |       |             |      |          |                |
| Left P1m log-intensity        | -3.44  | 3.51      | -0.98 | 0.340 | -10.81 3.93 | 0.49 | 0.62     | 0.05           |
| Mental processing scale score | 0.00   | 0.11      | 0.03  | 0.977 | -0.22 0.23  |      |          |                |
| <b><u>ASD</u></b>             |        |           |       |       |             |      |          |                |
| Left P1m log-intensity        | 2.31   | 2.68      | 0.86  | 0.396 | -3.14 7.76  | 0.41 | 0.67     | 0.16           |
| Mental processing scale score | 0.01   | 0.15      | 0.09  | 0.926 | -0.29 0.32  |      |          |                |

Coeff., regression coefficient; SE, standard error; CI, confidence interval;

\**p*<.05.
