# Supplementary material for: Neural responses to syllable-induced P1m and social impairment in children with autism spectrum disorder and typically developing Peers
Source: PubMed Central journal article supplement (PMC10923473; doi:10.1371/journal.pone.0298020), 2024-03-08
Supplement: pone.0298020.s006.pdf [file pone.0298020.s006.pdf]

**Supplementary Table 4.** Association between SRS-total T-score and right or left P1m latency controlling for Mental processing scale score in K-ABC and signal noise ratio

|                                                    | Coeff. | Robust SE | t     | <i>p</i> | 95%CI       | F     | Prob > F | <i>R</i> <sup>2</sup> |
|----------------------------------------------------|--------|-----------|-------|----------|-------------|-------|----------|-----------------------|
| <b>vs.SRS-total T-score</b>                        |        |           |       |          |             |       |          |                       |
| Left P1m latency                                   | -0.18  | 0.69      | -2.62 | 0.011*   | -0.32 -0.04 | 22.21 | <0.001   | 0.55                  |
| Diagnosis                                          | 13.86  | 10.21     | 1.36  | 0.181    | -6.63 34.35 |       |          |                       |
| Interaction between left P1m latency and diagnosis | 0.85   | 0.12      | 0.70  | 0.488    | -0.16 0.32  |       |          |                       |
| Mental processing scale score                      | -0.02  | 0.11      | -0.19 | 0.850    | -0.25 0.21  |       |          |                       |
| Square root of the number of averages              | -1.38  | 1.49      | -0.92 | 0.359    | -4.36 1.61  |       |          |                       |
| <b>vs.SRS-total T-score</b>                        |        |           |       |          |             |       |          |                       |
| <b><u>TD</u></b>                                   |        |           |       |          |             |       |          |                       |
| Left P1m latency                                   | -0.16  | 0.06      | -2.61 | 0.018*   | -0.29 -0.31 | 2.52  | 0.09     | 0.23                  |
| Mental processing scale score                      | -0.09  | 0.13      | -0.68 | 0.508    | -0.36 0.18  |       |          |                       |
| Square root of the number of averages              | 0.76   | 1.92      | 0.40  | 0.695    | -3.28 4.80  |       |          |                       |
| <b><u>ASD</u></b>                                  |        |           |       |          |             |       |          |                       |
| Left P1m latency                                   | -0.10  | 0.10      | -1.07 | 0.294    | -0.30 0.09  | 0.88  | 0.46     | 0.05                  |
| Mental processing scale score                      | -0.03  | 0.15      | -0.23 | 0.819    | -0.33 0.26  |       |          |                       |
| Square root of the number of averages              | -2.04  | 1.97      | -1.03 | 0.308    | -6.04 1.97  |       |          |                       |

Coeff., regression coefficient; SE, standard error; CI, confidence interval;

\**p*<.05.
