# Supplementary material for: Neural responses to syllable-induced P1m and social impairment in children with autism spectrum disorder and typically developing Peers
Source: PubMed Central journal article supplement (PMC10923473; doi:10.1371/journal.pone.0298020), 2024-03-08
Supplement: pone.0298020.s007.pdf [file pone.0298020.s007.pdf]

**Supplementary Table 5.** Correlation between the leftward lateralization in log-transformed P1m intensity and coil positions.

|                                                                         | Coeff. | Robust SE | t     | <i>p</i> | 95%CI  |        | F    | R <sup>2</sup> |
|-------------------------------------------------------------------------|--------|-----------|-------|----------|--------|--------|------|----------------|
| <b>vs. the leftward lateralization in log-transformed P1m intensity</b> |        |           |       |          |        |        |      |                |
| <b><u>Left Mastoid Process</u></b>                                      |        |           |       |          |        |        |      |                |
| x                                                                       | -0.002 | 0.003     | -0.74 | 0.46     | -0.009 | 0.004  | 0.55 | 0.005          |
| y                                                                       | -0.001 | 0.003     | -0.49 | 0.62     | -0.008 | 0.005  | 0.25 | 0.005          |
| z                                                                       | 0.003  | 0.002     | 1.16  | 0.25     | -0.002 | 0.008  | 1.35 | 0.026          |
| <b><u>Right Mastoid Process</u></b>                                     |        |           |       |          |        |        |      |                |
| x                                                                       | -0.005 | 0.010     | -0.49 | 0.63     | -0.026 | 0.016  | 0.24 | 0.005          |
| y                                                                       | 0.000  | 0.003     | -0.01 | 0.99     | -0.006 | 0.006  | 0.00 | <0.001         |
| z                                                                       | 0.002  | 0.003     | 0.76  | 0.45     | -0.003 | 0.007  | 0.58 | 0.012          |
| <b><u>Nasion</u></b>                                                    |        |           |       |          |        |        |      |                |
| x                                                                       | -0.016 | 0.006     | -2.61 | 0.01*    | -0.029 | -0.003 | 6.79 | 0.138          |
| y                                                                       | 0.000  | 0.004     | -0.11 | 0.91     | -0.008 | 0.007  | 0.01 | <0.001         |
| z                                                                       | 0.003  | 0.004     | 0.63  | 0.53     | -0.006 | 0.012  | 0.39 | 0.008          |

Coeff., regression coefficient; SE, standard error; CI, confidence interval
