# Supplementary material for: Neural responses to syllable-induced P1m and social impairment in children with autism spectrum disorder and typically developing Peers
Source: PubMed Central journal article supplement (PMC10923473; doi:10.1371/journal.pone.0298020), 2024-03-08
Supplement: pone.0298020.s008.pdf [file pone.0298020.s008.pdf]

**Supplementary Table 6.** Association between SRS-total T-score and leftward lateralization in P1m log-intensity controlling for Mental processing scale score in K-ABC and signal noise ratio

|                                                                            | Coeff. | Robust SE | t     | <i>p</i> | 95%CI  | F     | Prob > F | <i>R</i> <sup>2</sup> |      |
|----------------------------------------------------------------------------|--------|-----------|-------|----------|--------|-------|----------|-----------------------|------|
| <b>vs.SRS-total T-score</b>                                                |        |           |       |          |        |       |          |                       |      |
| Leftward lateralization in log-intensity                                   | -2.77  | 3.17      | -0.87 | 0.386    | -9.16  | 3.61  | 18.98    | <0.001                | 0.61 |
| Diagnosis                                                                  | 17.57  | 2.54      | 6.91  | <0.001*  | 12.45  | 22.69 |          |                       |      |
| Interaction between Leftward lateralization in log-intensity and diagnosis | 10.50  | 4.42      | 2.38  | 0.02*    | 1.60   | 19.40 |          |                       |      |
| Mental processing scale score                                              | 0.04   | 0.11      | 0.40  | 0.689    | -0.18  | 0.27  |          |                       |      |
| Square root of the number of averages                                      | -2.00  | 1.50      | -1.33 | 0.190    | -5.02  | 1.03  |          |                       |      |
| <b>vs.SRS-total T-score</b>                                                |        |           |       |          |        |       |          |                       |      |
| <b><u>TD</u></b>                                                           |        |           |       |          |        |       |          |                       |      |
| Leftward lateralization in log-intensity                                   | -3.05  | 3.46      | -0.88 | 0.379    | -10.35 | 4.26  | 0.78     | 0.52                  | 0.07 |
| Mental processing scale score                                              | -0.08  | 0.16      | -0.53 | 0.601    | -0.41  | 0.25  |          |                       |      |
| Square root of the number of averages                                      | 1.74   | 2.13      | 0.81  | 0.427    | -2.76  | 6.23  |          |                       |      |
| <b><u>ASD</u></b>                                                          |        |           |       |          |        |       |          |                       |      |
| Leftward lateralization in log-intensity                                   | 8.13   | 2.89      | 2.81  | 0.009*   | 2.18   | 14.07 | 4.17     | 0.02                  | 0.22 |
| Mental processing scale score                                              | 0.32   | 0.15      | 0.22  | 0.827    | -0.27  | 0.33  |          |                       |      |
| Square root of the number of averages                                      | -3.39  | 2.02      | -1.67 | 0.106    | -7.55  | 0.77  |          |                       |      |

Coeff., regression coefficient; SE, standard error; CI, confidence interval;

Leftward lateralization in log-intensity is defined as the log-transformed P1m intensity in the left hemisphere minus its counterpart in the right

\**p*<.05.
