# Supplementary material for: Neural responses to syllable-induced P1m and social impairment in children with autism spectrum disorder and typically developing Peers
Source: PubMed Central journal article supplement (PMC10923473; doi:10.1371/journal.pone.0298020), 2024-03-08
Supplement: pone.0298020.s009.pdf [file pone.0298020.s009.pdf]

**Supplementary Table 7.** Association between SRS-total T-score and leftward lateralization in P1m latency controlling for Mental processing scale score in K-ABC.

|                                                                      | Coeff. | Robust SE | t     | <i>p</i> | 95%CI | F     | Prob > F | <i>R</i> <sup>2</sup> |       |
|----------------------------------------------------------------------|--------|-----------|-------|----------|-------|-------|----------|-----------------------|-------|
| <b>vs.SRS-total T-score</b>                                          |        |           |       |          |       |       |          |                       |       |
| Leftward lateralization in latency                                   | -0.16  | 0.72      | -0.23 | 0.822    | -0.16 | 0.13  | 20.95    | <0.001                | 0.55  |
| Diagnosis                                                            | 20.10  | 2.43      | 8.28  | <0.001*  | 15.22 | 25.00 |          |                       |       |
| Interaction between Leftward lateralization in latency and diagnosis | -0.03  | 0.12      | -0.29 | 0.077    | -0.27 | 0.20  |          |                       |       |
| Mental processing scale score                                        | 0.29   | 0.11      | 0.26  | 0.796    | -0.20 | 0.26  |          |                       |       |
| <b>vs.SRS-total T-score</b>                                          |        |           |       |          |       |       |          |                       |       |
| <b><u>TD</u></b>                                                     |        |           |       |          |       |       |          |                       |       |
| Leftward lateralization in latency                                   | -0.02  | 0.75      | -0.23 | 0.817    | -0.17 | 0.14  | 0.04     | 0.96                  | <0.01 |
| Mental processing scale score                                        | -0.02  | 0.11      | -0.16 | 0.871    | -0.25 | 0.22  |          |                       |       |
| <b><u>ASD</u></b>                                                    |        |           |       |          |       |       |          |                       |       |
| Leftward lateralization in latency                                   | -0.05  | 0.09      | -0.54 | 0.590    | -0.24 | 0.14  | 0.18     | 0.83                  | 0.01  |
| Mental processing scale score                                        | 0.05   | 0.15      | 0.32  | 0.753    | -0.25 | 0.35  |          |                       |       |

Coeff., regression coefficient; SE, standard error; CI, confidence interval;

Leftward lateralization in latency is defined as P1m latency in the left hemisphere minus that in the right

\**p*<.05.
