# Supplementary material for: Neural responses to syllable-induced P1m and social impairment in children with autism spectrum disorder and typically developing Peers
Source: PubMed Central journal article supplement (PMC10923473; doi:10.1371/journal.pone.0298020), 2024-03-08
Supplement: pone.0298020.s010.pdf [file pone.0298020.s010.pdf]

**Supplementary Tables 8.** All results of analyses with new subjects only.

**n-Table 1.** Characteristics of participants (new subjects only).

|                                     | <i>N</i> | ASD<br><i>N</i> =28 | TD <i>N</i> =18 | <i>t</i> or $\chi^2$ | <i>p</i> |
|-------------------------------------|----------|---------------------|-----------------|----------------------|----------|
| Sex (%boys)                         |          | 64%                 | 78%             | 0.942                | 0.332    |
| Age in months                       |          | 57.3 (8.8)          | 69.2 (11.9)     | 0.648                | 0.521    |
| <b>SRS T-scores</b>                 |          |                     |                 |                      |          |
| Total                               |          | 2.9 (11.4)          | 50.7 (6.9)      | -7.407               | 0.000*   |
| Social awareness                    |          | 57.7 (9.5)          | 50.1 (7.0)      | -6.772               | 0.000*   |
| Social cognition                    |          | 4.8 (12.7)          | 51.7 (10.8)     | -6.361               | 0.000*   |
| Social communication                |          | 9.9 (10.5)          | 49.7 (6.2)      | -7.348               | 0.000*   |
| Social motivation                   |          | 0.5 (10.2)          | 53.2 (8.8)      | -2.500               | 0.000*   |
| Autistic mannerism                  |          | 5.9 (16.7)          | 49.5 (8.5)      | -6.181               | 0.000*   |
| K-ABC Mental processing scale score |          | 12.8 (14.7)         | 103.7 (11.1)    | 0.208                | 0.836    |

Numbers are mean (standard deviation) or counts.  
K-ABC, Kaufman Assessment Battery for Children;  
\**p*<.05.

**n-Table 2.** Association between SRS-total T-score and right or left P1m latency controlling for Mental processing scale score in K-ABC (new subjects only).

|                                                     | Coeff. | Robust SE | <i>t</i> | <i>p</i> | 95%CI       | F     | Prob > F | <i>R</i> <sup>2</sup> |
|-----------------------------------------------------|--------|-----------|----------|----------|-------------|-------|----------|-----------------------|
| <b>vs.SRS-total T-score</b>                         |        |           |          |          |             |       |          |                       |
| Right P1m Latency                                   | -0.08  | 0.11      | -0.69    | 0.498    | -0.31 0.16  | 18.99 | <0.001   | 0.60                  |
| Diagnosis                                           | 18.39  | 11.60     | 1.59     | 0.123    | -5.30 42.08 |       |          |                       |
| Interaction between right P1m latency and diagnosis | 0.03   | 0.16      | 0.15     | 0.878    | -0.31 0.36  |       |          |                       |
| Mental processing scale score                       | -0.04  | 0.11      | -0.38    | 0.708    | -0.27 0.19  |       |          |                       |
| <b>vs.SRS-total T-score</b>                         |        |           |          |          |             |       |          |                       |
| Left P1m latency                                    | -0.15  | 0.10      | -1.55    | 0.131    | -0.35 0.05  | 15.50 | <0.001   | 0.58                  |
| Diagnosis                                           | 23.08  | 11.54     | 2.00     | 0.054    | -0.42 46.58 |       |          |                       |
| Interaction between left P1m latency and diagnosis  | -0.04  | 0.15      | -0.25    | 0.806    | -0.34 0.27  |       |          |                       |
| Mental processing scale score                       | -0.03  | 0.12      | -0.21    | 0.836    | -0.28 0.23  |       |          |                       |

Coeff., regression coefficient; SE, standard error; CI, confidence interval;  
\**p*<.05.

**n-Table 3.** Association between SRS-total T-score and right or left P1m latency for each diagnosis group controlling for Mental processing scale score in K-ABC (new subjects only).

|                               | Coeff. | Robust SE | <i>t</i> | <i>p</i> | 95%CI      | F    | Prob > F | <i>R</i> <sup>2</sup> |
|-------------------------------|--------|-----------|----------|----------|------------|------|----------|-----------------------|
| <b>vs.SRS-total T-score</b>   |        |           |          |          |            |      |          |                       |
| <b>TD</b>                     |        |           |          |          |            |      |          |                       |
| Right P1m latency             | -0.08  | 0.12      | -0.66    | 0.519    | -0.33 0.18 | 0.39 | 0.68     | 0.07                  |
| Mental processing scale score | -0.09  | 0.12      | -0.73    | 0.479    | -0.34 0.17 |      |          |                       |
| <b>ASD</b>                    |        |           |          |          |            |      |          |                       |
| Right P1m latency             | -0.05  | 0.12      | -0.45    | 0.662    | -0.30 0.19 | 0.10 | 0.91     | 0.01                  |
| Mental processing scale score | -0.01  | 0.17      | -0.09    | 0.932    | -0.37 0.34 |      |          |                       |
| <b>vs.SRS-total T-score</b>   |        |           |          |          |            |      |          |                       |
| <b>TD</b>                     |        |           |          |          |            |      |          |                       |
| Left P1m latency              | -0.14  | 0.11      | -1.34    | 0.206    | -0.38 0.09 | 1.44 | 0.28     | 0.14                  |
| Mental processing scale score | -0.06  | 0.18      | -0.35    | 0.733    | -0.45 0.33 |      |          |                       |
| <b>ASD</b>                    |        |           |          |          |            |      |          |                       |
| Left P1m latency              | -0.19  | 0.12      | -1.65    | 0.116    | -0.43 0.05 | 1.36 | 0.28     | 0.14                  |
| Mental processing scale score | -0.02  | 0.15      | -0.10    | 0.923    | -0.34 0.31 |      |          |                       |

Coeff., regression coefficient; SE, standard error; CI, confidence interval;  
\**p*<.05.

**n-Table 4.** Association between SRS-total T-score and leftward lateralization in P1m log-intensity controlling for Mental processing scale score in K-ABC (new subjects only).

|                                                                            | Coeff. | Robust SE | <i>t</i> | <i>p</i> | 95%CI       | F     | Prob > F | <i>R</i> <sup>2</sup> |
|----------------------------------------------------------------------------|--------|-----------|----------|----------|-------------|-------|----------|-----------------------|
| <b>vs.SRS-total T-score</b>                                                |        |           |          |          |             |       |          |                       |
| Leftward lateralization in log-intensity                                   | -5.02  | 3.87      | -1.30    | 0.206    | -12.97 2.92 | 19.97 | <0.001   | 0.63                  |
| Diagnosis                                                                  | 16.65  | 2.77      | 6.00     | 0.000*   | 10.96 22.34 |       |          |                       |
| Interaction between Leftward lateralization in log-intensity and diagnosis | 12.36  | 5.43      | 2.28     | 0.031*   | 1.22 23.50  |       |          |                       |
| Mental processing scale score                                              | -0.03  | 0.11      | -0.27    | 0.788    | -0.26 0.20  |       |          |                       |
| <b>vs.SRS-total T-score</b>                                                |        |           |          |          |             |       |          |                       |
| <b>TD</b>                                                                  |        |           |          |          |             |       |          |                       |
| Leftward lateralization in log-intensity                                   | -6.03  | 4.26      | -1.41    | 0.185    | -15.40 3.35 | 1.64  | 0.24     | 0.17                  |
| Mental processing scale score                                              | -0.20  | 0.17      | -1.19    | 0.257    | -0.58 0.17  |       |          |                       |
| <b>ASD</b>                                                                 |        |           |          |          |             |       |          |                       |
| Leftward lateralization in log-intensity                                   | 7.64   | 3.18      | 2.40     | 0.030*   | 0.86 14.43  | 6.15  | 0.01     | 0.20                  |
| Mental processing scale score                                              | 0.04   | 0.14      | 0.29     | 0.773    | -0.26 0.34  |       |          |                       |

Coeff., regression coefficient; SE, standard error; CI, confidence interval;  
Leftward lateralization in log-intensity is defined as the log-transformed P1m intensity in the left hemisphere minus its counterpart in the right  
\**p*<.05.

**n-Supplementary Table 1.** Association between SRS-total T-score and right or left P1m log-intensity controlling for Mental processing scale score in K-ABC (new subjects only).

|                                                           | Coeff. | Robust SE | <i>t</i> | <i>p</i> | 95%CI        | F     | Prob > F | <i>R</i> <sup>2</sup> |
|-----------------------------------------------------------|--------|-----------|----------|----------|--------------|-------|----------|-----------------------|
| <b>vs.SRS-total T-score</b>                               |        |           |          |          |              |       |          |                       |
| Right P1m log-intensity                                   | 0.63   | 4.11      | 0.15     | 0.879    | -7.76 9.03   | 26.41 | <0.001   | 0.62                  |
| Diagnosis                                                 | 40.32  | 14.96     | 2.70     | 0.011    | 9.77 70.87   |       |          |                       |
| Interaction between right P1m log-intensity and diagnosis | -7.75  | 5.72      | -1.36    | 0.185    | -19.43 3.92  |       |          |                       |
| Mental processing scale score                             | -0.03  | 0.11      | -0.27    | 0.790    | -0.24 0.19   |       |          |                       |
| <b>vs.SRS-total T-score</b>                               |        |           |          |          |              |       |          |                       |
| Left P1m log-intensity                                    | -2.52  | 3.83      | -0.66    | 0.515    | -10.33 5.28  | 12.37 | <0.001   | 0.53                  |
| Diagnosis                                                 | 8.67   | 13.55     | 0.64     | 0.527    | -18.94 36.27 |       |          |                       |
| Interaction between left P1m log-intensity and diagnosis  | 3.79   | 4.78      | 0.79     | 0.434    | -5.94 13.52  |       |          |                       |
| Mental processing scale score                             | -0.12  | 0.15      | -0.78    | 0.439    | -0.42 0.19   |       |          |                       |

Coeff., regression coefficient; SE, standard error; CI, confidence interval;

**n-Supplementary Table 2.** Association between SRS-total T-score and right or left P1m log-intensity for each diagnosis group controlling for Mental processing scale score in K-ABC (new subjects only).

|                               | Coeff. | Robust SE | <i>t</i> | <i>p</i> | 95%CI       | F    | Prob > F | <i>R</i> <sup>2</sup> |
|-------------------------------|--------|-----------|----------|----------|-------------|------|----------|-----------------------|
| <b>vs.SRS-total T-score</b>   |        |           |          |          |             |      |          |                       |
| <b>TD</b>                     |        |           |          |          |             |      |          |                       |
| Right P1m log-intensity       | 1.50   | 3.89      | 0.39     | 0.706    | -6.91 9.91  | 0.51 | 0.61     | 0.03                  |
| Mental processing scale score | -0.11  | 0.12      | -0.98    | 0.346    | -0.37 0.14  |      |          |                       |
| <b>ASD</b>                    |        |           |          |          |             |      |          |                       |
| Right P1m log-intensity       | -7.28  | 3.54      | -2.06    | 0.056    | -14.79 0.23 | 2.57 | 0.11     | 0.10                  |
| Mental processing scale score | 0.02   | 0.15      | 0.12     | 0.905    | -0.30 0.33  |      |          |                       |
| <b>vs.SRS-total T-score</b>   |        |           |          |          |             |      |          |                       |
| <b>TD</b>                     |        |           |          |          |             |      |          |                       |
| Left P1m log-intensity        | -2.53  | 4.16      | -0.61    | 0.555    | -11.69 6.63 | 0.67 | 0.53     | 0.07                  |
| Mental processing scale score | -0.12  | 0.18      | -0.65    | 0.528    | -0.51 0.28  |      |          |                       |
| <b>ASD</b>                    |        |           |          |          |             |      |          |                       |
| Left P1m log-intensity        | 1.27   | 3.01      | 0.42     | 0.679    | -5.02 7.55  | 0.24 | 0.79     | 0.03                  |
| Mental processing scale score | -0.12  | 0.19      | -0.63    | 0.536    | -0.51 0.27  |      |          |                       |

Coeff., regression coefficient; SE, standard error; CI, confidence interval;  
\**p*<.05.

**n-Supplementary Table 3.** Association between SRS-total T-score and right or left P1m latency controlling for Mental processing scale score in K-ABC and signal noise ratio (new subjects only).

|                                                    | Coeff. | Robust SE | <i>t</i> | <i>p</i> | 95%CI       | F     | Prob > F | <i>R</i> <sup>2</sup> |
|----------------------------------------------------|--------|-----------|----------|----------|-------------|-------|----------|-----------------------|
| <b>vs.SRS-total T-score</b>                        |        |           |          |          |             |       |          |                       |
| Left P1m latency                                   | -0.14  | 0.09      | -1.51    | 0.141    | -0.32 0.05  | 13.13 | <0.001   | 0.60                  |
| Diagnosis                                          | 22.23  | 10.86     | 2.05     | 0.049*   | 0.07 44.39  |       |          |                       |
| Interaction between left P1m latency and diagnosis | -0.02  | 0.14      | -0.11    | 0.910    | -0.29 0.26  |       |          |                       |
| Mental processing scale score                      | -0.02  | 0.13      | -0.17    | 0.863    | -0.28 0.24  |       |          |                       |
| Square root of the number of averages              | 1.75   | 1.58      | 1.11     | 0.276    | -1.47 4.96  |       |          |                       |
| <b>vs.SRS-total T-score</b>                        |        |           |          |          |             |       |          |                       |
| <b>TD</b>                                          |        |           |          |          |             |       |          |                       |
| Left P1m latency                                   | -0.09  | 0.11      | -0.75    | 0.470    | -0.34 0.17  | 2.69  | 0.10     | 0.29                  |
| Mental processing scale score                      | -0.20  | 0.25      | -0.79    | 0.447    | -0.76 0.36  |       |          |                       |
| Square root of the number of averages              | 3.69   | 2.83      | 1.30     | 0.221    | -2.61 10.00 |       |          |                       |
| <b>ASD</b>                                         |        |           |          |          |             |       |          |                       |
| Left P1m latency                                   | -0.17  | 0.10      | -1.65    | 0.116    | -0.38 0.05  | 0.95  | 0.44     | 0.16                  |
| Mental processing scale score                      | 0.00   | 0.16      | 0.02     | 0.985    | -0.33 0.33  |       |          |                       |
| Square root of the number of averages              | 1.25   | 2.22      | 0.56     | 0.579    | -3.39 5.89  |       |          |                       |

Coeff., regression coefficient; SE, standard error; CI, confidence interval;  
\**p*<.05.

**n-Supplementary Table 4.** Association between SRS-total T-score and leftward lateralization in P1m log-intensity controlling for Mental processing scale score in K-ABC and signal noise ratio (new subjects only).

|                                                                            | Coeff. | Robust SE | <i>t</i> | <i>p</i> | 95%CI       | F     | Prob > F | <i>R</i> <sup>2</sup> |
|----------------------------------------------------------------------------|--------|-----------|----------|----------|-------------|-------|----------|-----------------------|
| <b>vs.SRS-total T-score</b>                                                |        |           |          |          |             |       |          |                       |
| Leftward lateralization in log-intensity                                   | -4.64  | 4.10      | -1.13    | 0.268    | -13.07 3.78 | 16.86 | <0.001   | 0.64                  |
| Diagnosis                                                                  | 17.83  | 2.73      | 6.52     | 0.000*   | 12.21 23.46 |       |          |                       |
| Interaction between Leftward lateralization in log-intensity and diagnosis | 11.16  | 5.84      | 1.91     | 0.067    | -0.85 23.17 |       |          |                       |
| Mental processing scale score                                              | -0.03  | 0.12      | -0.26    | 0.796    | -0.27 0.21  |       |          |                       |
| Square root of the number of averages                                      | 1.33   | 1.98      | 0.67     | 0.508    | -2.74 5.39  |       |          |                       |
| <b>vs.SRS-total T-score</b>                                                |        |           |          |          |             |       |          |                       |
| <b>TD</b>                                                                  |        |           |          |          |             |       |          |                       |
| Leftward lateralization in log-intensity                                   | -5.52  | 4.86      | -1.13    | 0.283    | -16.36 5.32 | 5.38  | 0.02     | 0.37                  |
| Mental processing scale score                                              | -0.31  | 0.18      | -1.70    | 0.120    | -0.72 0.10  |       |          |                       |
| Square root of the number of averages                                      | 4.00   | 2.38      | 1.68     | 0.124    | -1.31 9.31  |       |          |                       |
| <b>ASD</b>                                                                 |        |           |          |          |             |       |          |                       |
| Leftward lateralization in log-intensity                                   | 7.41   | 3.57      | 2.08     | 0.057    | -0.24 15.07 | 3.90  | 0.03     | 0.20                  |
| Mental processing scale score                                              | 0.05   | 0.14      | 0.32     | 0.752    | -0.26 0.35  |       |          |                       |
| Square root of the number of averages                                      | 0.40   | 3.12      | 0.13     | 0.900    | -6.29 7.09  |       |          |                       |

Coeff., regression coefficient; SE, standard error; CI, confidence interval;  
Leftward lateralization in log-intensity is defined as the log-transformed P1m intensity in the left hemisphere minus its counterpart in the right  
\**p*<.05.

**n-Supplementary Table 5.** Association between SRS-total T-score and leftward lateralization in P1m latency controlling for Mental processing scale score in K-ABC (new subjects only).

|                                                                      | Coeff. | Robust SE | <i>t</i> | <i>p</i> | 95%CI       | F     | Prob > F | <i>R</i> <sup>2</sup> |
|----------------------------------------------------------------------|--------|-----------|----------|----------|-------------|-------|----------|-----------------------|
| <b>vs.SRS-total T-score</b>                                          |        |           |          |          |             |       |          |                       |
| Leftward lateralization in latency                                   | -0.01  | 0.06      | -0.14    | 0.889    | -0.14 0.12  | 19.06 | <0.001   | 0.57                  |
| Diagnosis                                                            | 19.06  | 2.69      | 7.08     | 0.000*   | 13.54 24.58 |       |          |                       |
| Interaction between Leftward lateralization in latency and diagnosis | -0.06  | 0.11      | -0.54    | 0.591    | -0.29 0.17  |       |          |                       |
| Mental processing scale score                                        | -0.02  | 0.12      | -0.14    | 0.891    | -0.26 0.23  |       |          |                       |
| <b>vs.SRS-total T-score</b>                                          |        |           |          |          |             |       |          |                       |
| <b>TD</b>                                                            |        |           |          |          |             |       |          |                       |
| Leftward lateralization in latency                                   | 0.00   | 0.07      | 0.05     | 0.962    | -0.16 0.17  | 0.33  | 0.73     | 0.04                  |
| Mental processing scale score                                        | -0.14  | 0.18      | -0.77    | 0.458    | -0.54 0.26  |       |          |                       |
| <b>ASD</b>                                                           |        |           |          |          |             |       |          |                       |
| Leftward lateralization in latency                                   | -0.08  | 0.09      | -0.93    | 0.365    | -0.27 0.10  | 0.47  | 0.63     | 0.03                  |
| Mental processing scale score                                        | 0.04   | 0.15      | 0.26     | 0.801    | -0.27 0.35  |       |          |                       |

Coeff., regression coefficient; SE, standard error; CI, confidence interval;  
Leftward lateralization in latency is defined as P1m latency in the left hemisphere minus that in the right  
\**p*<.05.
